# Supplementary material for: Meta-analysis of the association between major foods with added fructose and non-alcoholic fatty liver disease
Source: Royal Society of Chemistry journal article supplement (doi:10.1039/d3fo00882g), 2023-01-01
Supplement: d3fo00882g2.pdf [file d3fo00882g2.pdf]

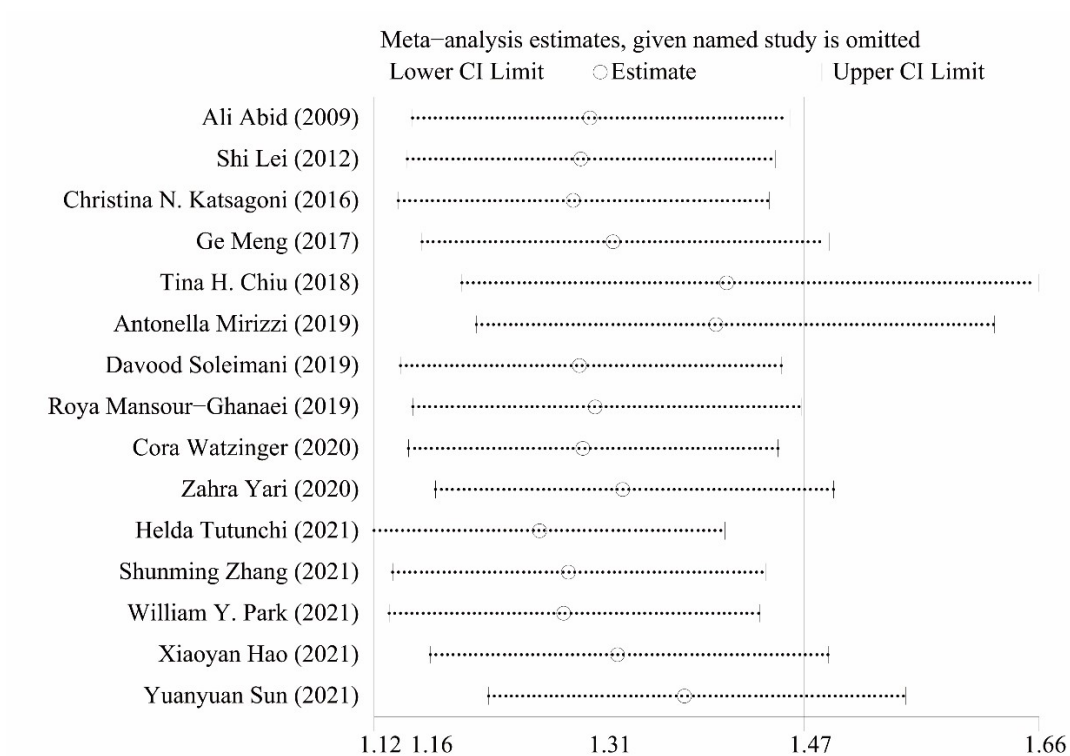

**Figure S1:** Sensitivity analysis of the association between major food sources of added fructose and non-alcoholic fatty liver disease.

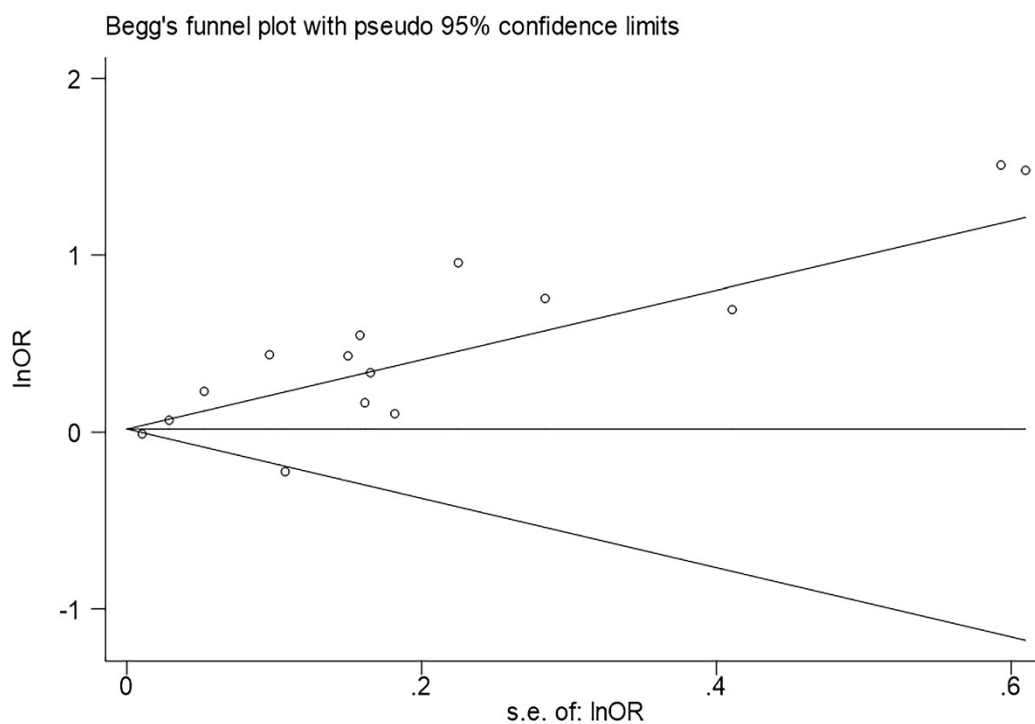

**Figure S2.1:** Begg's regression test for identifying publication bias.

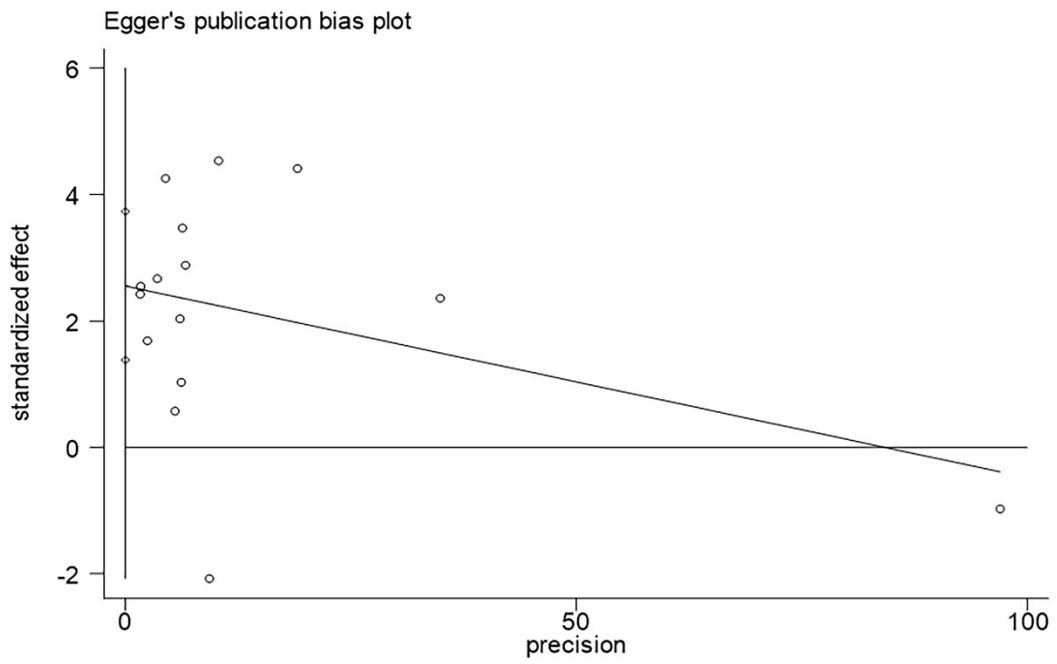

**Figure S2.2:** Egger's regression test for identifying publication bias.

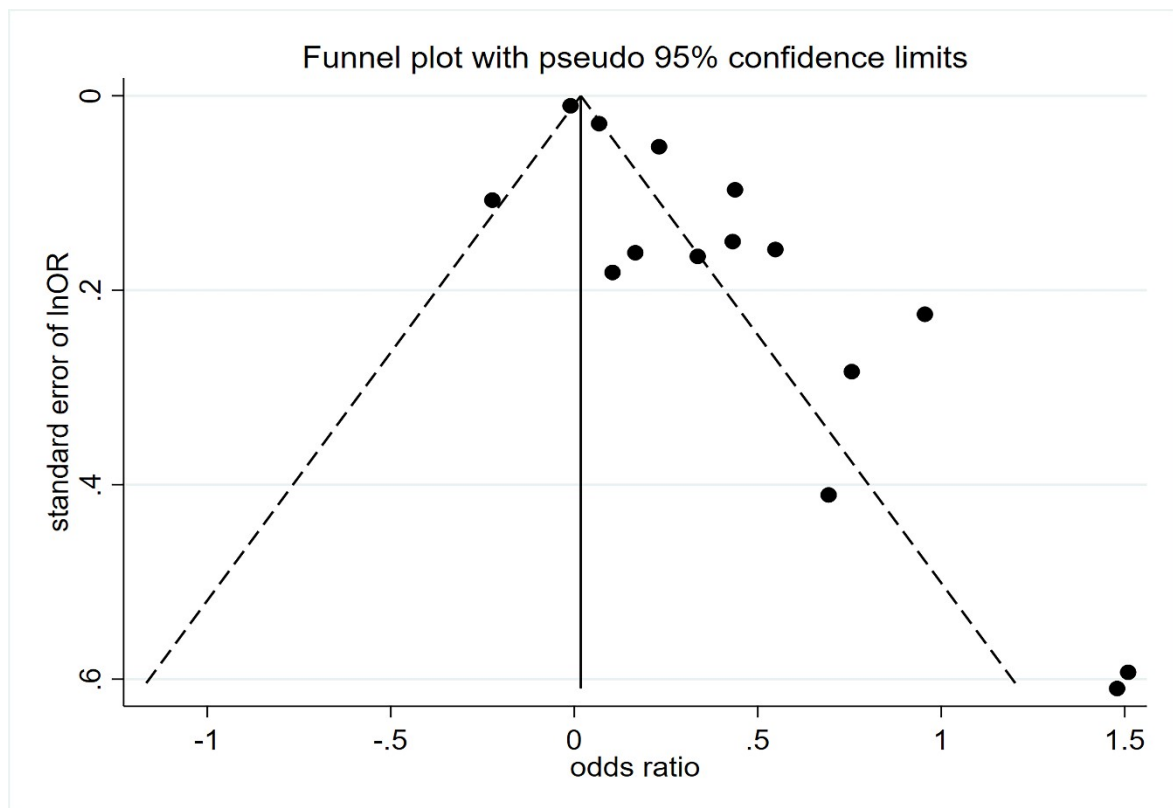

**Figure S3:** Publication bias funnel plots for the relation of major food sources of added fructose and NAFLD in studies.

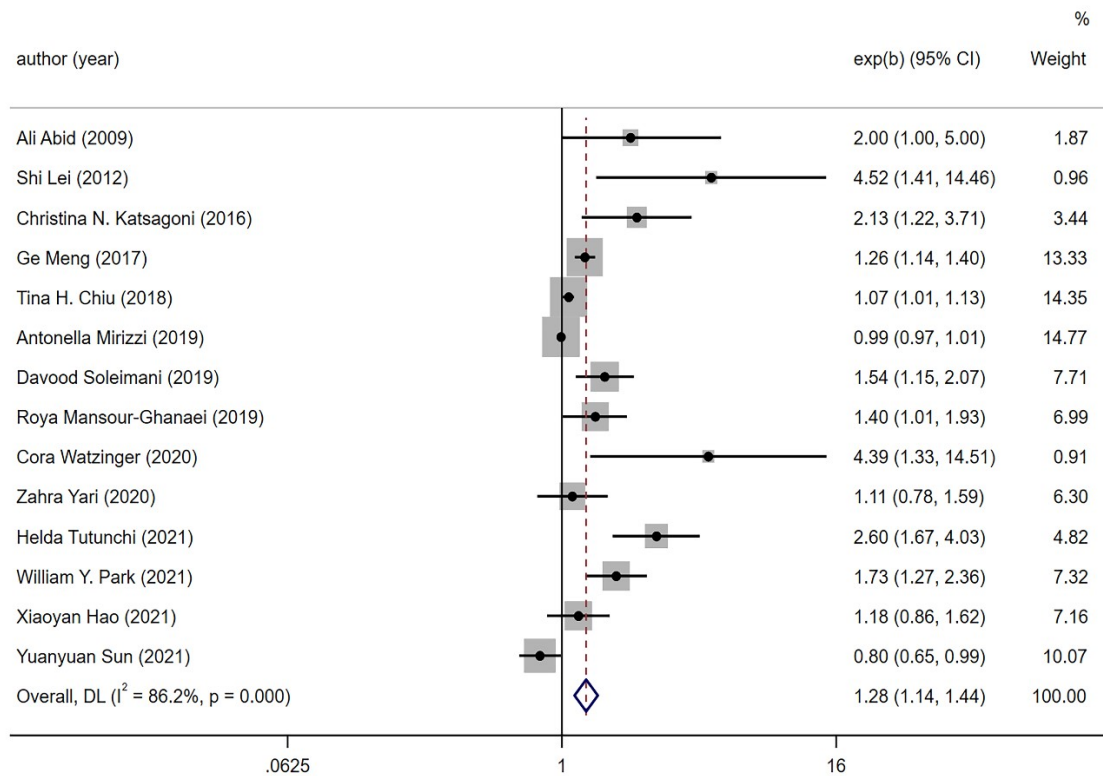

**Figure S4:** Overall pooled analysis of the association between major food sources of added fructose and non-alcoholic fatty liver disease (Excluded Shunming Zhang (2021)).

**Table S1. Quality assessment scale of cohort study or case-control study.**

| Study                            | Selection                                            |                                                  |                                    | Comparability                                                                                |                                                                                 | Outcome                     |                                                               | Quality score |                                        |
|----------------------------------|------------------------------------------------------|--------------------------------------------------|------------------------------------|----------------------------------------------------------------------------------------------|---------------------------------------------------------------------------------|-----------------------------|---------------------------------------------------------------|---------------|----------------------------------------|
|                                  | Representa-<br>-tiveness of<br>the exposed<br>cohort | Selection<br>of the<br>non-<br>exposed<br>cohort | Ascertain-<br>-ment of<br>exposure | Demonstration<br>that the outcome<br>of interest was not<br>present at start of<br>the study | Comparability of<br>cohorts on the<br>basis of the<br>design or the<br>analysis | Ascertainment<br>of outcome | Was follow-<br>up long<br>enough for<br>outcomes to<br>occur? |               | Adequacy of<br>follow-up of<br>cohorts |
| Christina N.<br>Katsagoni (2016) | *                                                    |                                                  | *                                  |                                                                                              | *                                                                               | *                           | *                                                             | *             | 6                                      |
| Helda Tutunchi<br>(2021)         | *                                                    | *                                                | *                                  |                                                                                              | **                                                                              | *                           |                                                               | *             | 7                                      |
| SHI Lei (2012)                   | *                                                    | *                                                | *                                  |                                                                                              | *                                                                               | *                           |                                                               | *             | 6                                      |
| Shunming Zhang<br>(2021)         | *                                                    | *                                                | *                                  | *                                                                                            | *                                                                               | *                           | *                                                             | *             | 8                                      |
| William Y. Park<br>(2021)        | *                                                    | *                                                | *                                  | *                                                                                            | **                                                                              | *                           | *                                                             | *             | 9                                      |
| Xiaoyan Hao<br>(2021)            | *                                                    | *                                                | *                                  |                                                                                              | *                                                                               | *                           | *                                                             | *             | 7                                      |
| Yuanyuan Sun<br>(2021)           | *                                                    | *                                                | *                                  |                                                                                              | *                                                                               | *                           | *                                                             | *             | 7                                      |
| Zahra Yari<br>(2020)             | *                                                    | *                                                | *                                  |                                                                                              | **                                                                              | *                           | *                                                             | *             | 7                                      |

**Table S2. Cross-sectional study quality assessment scale.**

| <b>study</b>                       | <b>1*</b> | <b>2*</b> | <b>3*</b> | <b>4*</b> | <b>5*</b> | <b>6*</b> | <b>7*</b> | <b>8*</b> | <b>9*</b> | <b>10*</b> | <b>11*</b> | <b>Quality Score</b> |
|------------------------------------|-----------|-----------|-----------|-----------|-----------|-----------|-----------|-----------|-----------|------------|------------|----------------------|
| <b>Antonella Mirizzi (2019)</b>    | Yes       | Yes       | Yes       | Yes       | No        | Yes       | Yes       | Yes       | No        | Yes        | No         | 8                    |
| <b>Ali Abid (2009)</b>             | Yes       | Yes       | Yes       | Yes       | No        | No        | Yes       | Yes       | No        | Yes        | No         | 7                    |
| <b>Cora Watzinger (2020)</b>       | Yes       | Yes       | Yes       | Yes       | No        | Yes       | Yes       | Yes       | No        | Yes        | No         | 8                    |
| <b>Davood Soleimani (2019)</b>     | Yes       | Yes       | Yes       | Yes       | No        | Yes       | Yes       | Yes       | No        | Yes        | No         | 8                    |
| <b>Ge Meng (2017)</b>              | Yes       | Yes       | Yes       | Yes       | No        | Yes       | Yes       | Yes       | No        | Yes        | No         | 8                    |
| <b>Roya Mansour-Ghanaei (2019)</b> | Yes       | Yes       | Yes       | Yes       | No        | Yes       | Yes       | No        | No        | Yes        | No         | 7                    |
| <b>Tina H. Chiu (2018)</b>         | Yes       | Yes       | Yes       | Yes       | No        | Yes       | Yes       | Yes       | No        | Yes        | No         | 8                    |

\*Cross-sectional study quality assessment items:

1. Define the source of information (survey, record review).
2. List inclusion and exclusion criteria for exposed and unexposed subjects (cases and controls) or refer to previous publications.
3. Indicate time period used for identifying patients.
4. Indicate whether or not subjects were consecutive if not population-based.
5. Indicate if evaluators of subjective components of study were masked to other aspects of the status of the participants.
6. Describe any assessments undertaken for quality assurance purposes (e.g., test/retest of primary outcome measurements).
7. Explain any patient exclusions from analysis.
8. Describe how confounding was assessed and/or controlled.

9. If applicable, explain how missing data were handled in the analysis.
10. Summarize patient response rates and completeness of data collection.
11. Clarify what follow-up, if any, was expected and the percentage of patients for which incomplete data or follow-up was obtained.
